# Supplementary material
Source: PubMed Central journal article supplement (PMC11477845)
Supplement: ajcr0014-4429-f6.pdf [file ajcr0014-4429-f6.pdf]

## Supplementary Materials

### Single cell RNA sequencing and bioinformatics analysis

#### *Experimental protocol and library generation*

Single cell suspensions, achieved as described above, were loaded onto a 10 × Genomics Chromium instrument to generate single-cell gel beads in emulsion.

#### *Sequencing and data processing*

The single cell libraries were sequenced on an Illumina NextSeq 500 sequencer according to the manufacturer's protocol. We used the 10 × Genomics Cell Ranger (version 3.1.0) pipeline to process the raw data from the sequencer and to generate the count matrices, including the filtered count matrices by following the manufacturer's standard workflow for 10 × Genomics Single Cell Expression data. The 10 × Genomics Loupe Browser software was used to visualize and interactively explore the results from the Cell Ranger pipeline.

Raw RNASeq transcripts were aligned to the GRCh38 human genome and the mm10 mouse genome using CellRanger v7.1.0 [1]. Count matrices for samples were subsequently imported into the R computing environment (v4.2.2) using the Seurat package (v4.3) [2, 3]. Cells were initially filtered using a 15% upper threshold in read count fraction or unique gene fraction of the minor species, then classified as murine or human based on the majority of aligned reads. Subsequent low quality cells were identified and removed using the miQC tool within Seurat [4]. Single cell read counts were then normalized and variance-stabilized using SCTransform [5]. Doublets were identified and removed using the DoubletFinder tool [6]. Cell type annotation was performed using the SingleR tool, with the Human Primary Cell Atlas as reference, as retrieved via the celldex package [7]. Samples were then combined into a single dataset using the Harmony batch correction tool [8]. Visualization using the UMAP projection was generated through the Seurat package [9].

Differential expression was conducted through the Seurat package using the MAST algorithm [10]. Gene scores were calculated using the following equation:

$$\text{Score} = (-\log_{10}(p) * \text{sign}(FC)) + \log_2(FC) * \max(\text{pct.1}, \text{pct.2})$$

In the event that the  $p$ -value was indicated as zero (i.e. smaller than machine error), the value 500 was substituted for  $-\log_{10}(p)$ .  $\text{pct.1}$  and  $\text{pct.2}$  are calculated through the differential expression as the percentage of cells in each contrast condition that express the gene in question. Based on these gene scores, a preranked gene list was then analyzed using Gene Set Enrichment Analysis on the Hallmark gene sets [11, 12].

### References

- [1] Zheng GX, Terry JM, Belgrader P, Ryvkin P, Bent ZW, Wilson R, Zivaldo SB, Wheeler TD, McDermott GP, Zhu J, Gregory MT, Shuga J, Montesclaros L, Underwood JG, Masquelier DA, Nishimura SY, Schnall-Levin M, Wyatt PW, Hindson CM, Bharadwaj R, Wong A, Ness KD, Beppu LW, Deeg HJ, McFarland C, Loeb KR, Valente WJ, Ericson NG, Stevens EA, Radich JP, Mikkelsen TS, Hindson BJ and Bielas JH. Massively parallel digital transcriptional profiling of single cells. *Nat Commun* 2017; 8: 14049.
- [2] R: a language and environment for statistical computing. Vienna, Austria: R Foundation for Statistical Computing; 2022.
- [3] Hao Y, Hao S, Andersen-Nissen E, Mauck WM 3rd, Zheng S, Butler A, Lee MJ, Wilk AJ, Darby C, Zager M, Hoffman P, Stoeckius M, Papalexi E, Mimitou EP, Jain J, Srivastava A, Stuart T, Fleming LM, Yeung B, Rogers AJ, McElrath JM, Blish CA, Gottardo R, Smibert P and Satija R. Integrated analysis of multimodal single-cell data. *Cell* 2021; 184: 3573-3587, e3529.

## p53 attenuates aggressiveness of ATC

- [4] Hippen AA, Falco MM, Weber LM, Erkan EP, Zhang K, Doherty JA, Vähärautio A, Greene CS and Hicks SC. miQC: an adaptive probabilistic framework for quality control of single-cell RNA-sequencing data. *PLoS Comput Biol* 2021; 17: e1009290.
- [5] Hafemeister C and Satija R. Normalization and variance stabilization of single-cell RNA-seq data using regularized negative binomial regression. *Genome Biol* 2019; 20: 296.
- [6] McGinnis CS, Murrow LM and Gartner ZJ. DoubletFinder: doublet detection in single-cell RNA sequencing data using artificial nearest neighbors. *Cell Syst* 2019; 8: 329-337, e4.
- [7] Aran D, Looney AP, Liu L, Wu E, Fong V, Hsu A, Chak S, Naikawadi RP, Wolters PJ, Abate AR, Butte AJ and Bhattacharya M. Reference-based analysis of lung single-cell sequencing reveals a transitional profibrotic macrophage. *Nat Immunol* 2019; 20: 163-172.
- [8] Korsunsky I, Millard N, Fan J, Slowikowski K, Zhang F, Wei K, Baglaenko Y, Brenner M, Loh PR and Raychaudhuri S. Fast, sensitive and accurate integration of single-cell data with Harmony. *Nat Methods* 2019; 16: 1289-1296.
- [9] Becht E, McInnes L, Healy J, Dutertre CA, Kwok IWH, Ng LG, Ginhoux F and Newell EW. Dimensionality reduction for visualizing single-cell data using UMAP. *Nat Biotechnol* 2018; 37: 38-44.
- [10] Finak G, McDavid A, Yajima M, Deng J, Gersuk V, Shalek AK, Slichter CK, Miller HW, McElrath MJ, Prlic M, Linsley PS and Gottardo R. MAST: a flexible statistical framework for assessing transcriptional changes and characterizing heterogeneity in single-cell RNA sequencing data. *Genome Biol* 2015; 16: 278.
- [11] Subramanian A, Tamayo P, Mootha VK, Mukherjee S, Ebert BL, Gillette MA, Paulovich A, Pomeroy SL, Golub TR, Lander ES and Mesirov JP. Gene set enrichment analysis: a knowledge-based approach for interpreting genome-wide expression profiles. *Proc Natl Acad Sci U S A* 2005; 102: 15545-50.
- [12] Liberzon A, Birger C, Thorvaldsdóttir H, Ghandi M, Mesirov JP and Tamayo P. The molecular signatures database (MSigDB) hallmark gene set collection. *Cell Syst* 2015; 1: 417-425.

## p53 attenuates aggressiveness of ATC

**Supplementary Table 1.** Antibodies used in the analysis

| Reagent                                          | Source                    | Identifier       |
|--------------------------------------------------|---------------------------|------------------|
| Antibodies                                       |                           |                  |
| Mouse anti $\beta$ -actin                        | Santa Cruz                | Cat# sc-47778    |
| Rabbit Anti p53                                  | Abcam                     | Cat# ab131442    |
| Mouse Anti p53                                   | Proteintech               | Cat# 60283-1-Ig  |
| Rabbit anti Cleaved caspase-3                    | Cell Signaling Technology | Cat# 9664        |
| Rabbit anti Ki-67                                | Cell Signaling Technology | Cat# 44092       |
| Mouse Anti PUMA                                  | Abcam                     | Cat# ab9645      |
| Rabbit Anti BAX                                  | Abcam                     | Cat# ab32503     |
| Mouse p21                                        | Proteintech               | Cat# 10355-1-AP  |
| Rabbit anti NIS                                  | Gifts From Dr. Jhiang     |                  |
| Donkey anti-rabbit IgG                           | GE Healthcare Life        | Cat# NA9340V     |
| Peroxidase AffiniPure Goat Anti-Rabbit IgG (H+L) | Jackson ImmunoResearch    | Cat# 111-035-144 |
| Goat anti-Rabbit IgG Alexa Flor 488              | Thermo Fisher             | Cat# A11034      |
| Goat anti-mouse IgG Alexa Flor 568               | Thermo Fisher             | Cat# A11004      |
| MemBrite® Fix Cell Surface Staining Kits         | Biotium                   | Cat# 30097-T     |

**Supplementary Table 2.** Primer sequences used in the q/PCR analysis

| Gene name      | Forward sequence         | Reverse sequence        |
|----------------|--------------------------|-------------------------|
| <i>PUMA</i>    | ACGACCTCAACGCACAGTACGA   | CCTAATTGGGCTCCATCTCGGG  |
| <i>BAX</i>     | TCAGGATGCGTCCACCAAGAAG   | TGTGTCCACGGCGGCAATCATC  |
| <i>p21</i>     | AGGTGGACCTGGAGACTCTCAG   | TCCTCTGGAGAAGATCAGCCG   |
| <i>CEBPD</i>   | TCCGGCAGTTCTCAAGCAGCT    | GAGGTATGGGTCGTTGCTGAGT  |
| <i>NFkBIA</i>  | TCCACTCCATCCTGAAGGCTAC   | CAAGGACACCAAAGCTCCACG   |
| <i>TNFAIP3</i> | CTCAACTGGTGTGAGAAGTCC    | TTCCTTGAGCGTGCTGAACAGC  |
| <i>CXCL2</i>   | GGCAGAAAGCTTGTCTCAACCC   | CTCCTCAGGAACAGCCACCAA   |
| <i>CXCL3</i>   | TTCACCTCAAGAACATCCAAAGTG | TTCTTCCCATTCTTGAGTGTGGC |
| <i>IL6</i>     | AGACAGCCACTCACCTCTTCCAG  | TTCTGCCAGTGCCTCTTTGCTG  |
| <i>TNF</i>     | CTCTTCTGCCTGCTGCACTTTG   | ATGGGCTACAGGCTTGTCACTC  |
| <i>ID2</i>     | TTGTCAGCCTGCATCACCAGAG   | AGCCACACAGTGCTTTGCTGTC  |
| <i>CXCL1</i>   | AGCTTGCCCTCAATCCTGCATCC  | TCCTTCAGGAACAGCCACCAGT  |
| <i>TNFAIP8</i> | CGTGGTCAGTTTCCATCAGGTG   | CGTCCATGTGACTTGGCAGTGA  |
| <i>cMYC</i>    | CCTGGTGCTCCATGAGGAGAC    | CAGACTCTGACCTTTTGCCAGG  |
| <i>SLC5A5</i>  | CTCTGCTGGTGTGGACATCTT    | GAGGTCTTCTACAGTGACTGCAG |
| <i>GAPDH</i>   | GTCTCCTCTGACTTCAACAGCG   | ACCACCCTGTTGCTGTAGCCAA  |

**Supplementary Table 3.** Total cell counts before filtering

| Sample         | Mouse | Human | Total |
|----------------|-------|-------|-------|
| 8505C-WTp53    | 1422  | 3684  | 4286  |
| 8505C-MTp53    | 1222  | 2043  | 3265  |
| 8505C parental | 931   | 2551  | 3482  |

## p53 attenuates aggressiveness of ATC

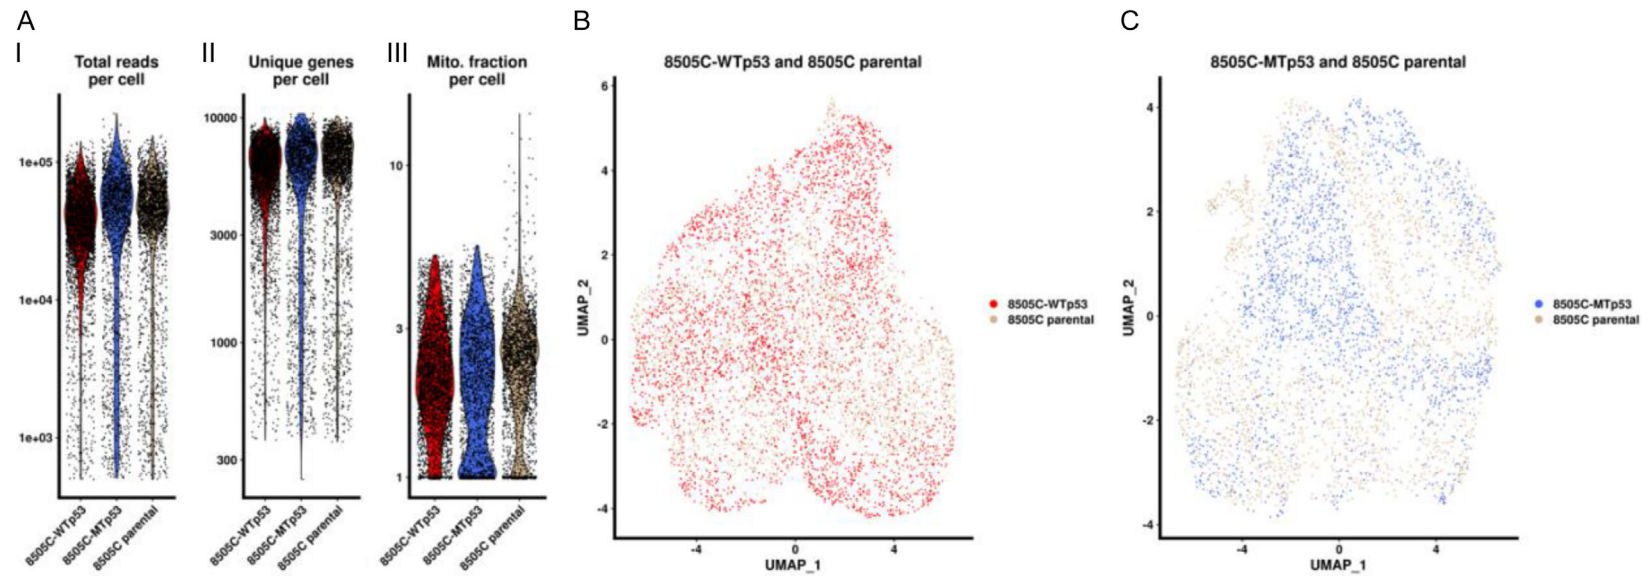

**Supplementary Figure 1.** Transcriptomic analysis of single cells from tumors induced by 8505C, 8505C-WTp53 or 8505C-MTp53 cells. (A) Total read counts (I), unique gene counts (II), and mitochondrial fraction in the human cells (III) show reasonably consistent quality (all values shown in logarithmic scale). (B) UMAP profiles to compare the distribution of cells between 8505C-WTp53- and 8505C parental cells-induced tumors. (C) UMAP profiles to compare the distribution of cells between 8505C-MTp53- and 8505C parental cells-induced tumors.

## p53 attenuates aggressiveness of ATC

**Supplementary Table 4.** Top 20 enriched gene sets in WTp53 cells

| Rank | Geneset                             | Size | Enrichment score | Normalized enrichment score | P-val  | FDR    |
|------|-------------------------------------|------|------------------|-----------------------------|--------|--------|
| 1    | Hallmark TNFA Signaling Via NFkB    | 190  | -0.28            | -4.48                       | <1E-03 | <1E-03 |
| 2    | Hallmark Adipogenesis               | 189  | -0.25            | -4.04                       | <1E-03 | <1E-03 |
| 3    | Hallmark IL6 Jak STAT3 Signaling    | 70   | -0.38            | -3.76                       | <1E-03 | <1E-03 |
| 4    | Hallmark Fatty Acid Metabolism      | 141  | -0.27            | -3.71                       | <1E-03 | <1E-03 |
| 5    | Hallmark Mitotic Spindle            | 199  | -0.23            | -3.7                        | <1E-03 | <1E-03 |
| 6    | Hallmark UV Response DN             | 143  | -0.25            | -3.48                       | <1E-03 | <1E-03 |
| 7    | Hallmark Interferon Gamma Response  | 174  | -0.21            | -3.16                       | <1E-03 | <1E-03 |
| 8    | Hallmark Peroxisome                 | 97   | -0.28            | -3.16                       | <1E-03 | <1E-03 |
| 9    | Hallmark Complement                 | 173  | -0.19            | -2.98                       | <1E-03 | <1E-03 |
| 10   | Hallmark Xenobiotic Metabolism      | 163  | -0.2             | -2.96                       | <1E-03 | <1E-03 |
| 11   | Hallmark PI3K AKT mTOR Signaling    | 99   | -0.23            | -2.7                        | <1E-03 | <1E-03 |
| 12   | Hallmark Interferon Alpha Response  | 92   | -0.24            | -2.66                       | <1E-03 | <1E-03 |
| 13   | Hallmark Inflammatory Response      | 165  | -0.17            | -2.54                       | 0.002  | <1E-03 |
| 14   | Hallmark KRAS Signaling UP          | 167  | -0.17            | -2.46                       | <1E-03 | 0.001  |
| 15   | Hallmark Apical Junction            | 180  | -0.15            | -2.44                       | 0.002  | 0.001  |
| 16   | Hallmark Allograft Rejection        | 144  | -0.15            | -2.08                       | 0.002  | 0.004  |
| 17   | Hallmark BILE Acid Metabolism       | 93   | -0.15            | -1.68                       | 0.034  | 0.036  |
| 18   | Hallmark Wnt Beta Catenin Signaling | 38   | -0.19            | -1.37                       | 0.112  | 0.139  |
| 19   | Hallmark Hedgehog Signaling         | 33   | -0.2             | -1.35                       | 0.117  | 0.142  |
| 20   | Hallmark KRAS Signaling DN          | 124  | -0.1             | -1.26                       | 0.179  | 0.192  |
